# Supplementary material for: Renal Outcomes and Dosage Considerations Associated with Bisphosphonate Use: A Systematic Review of Randomized Clinical Trials
Source: Research Square preprint supplement (doi:10.21203/rs.3.rs-9724722/v1), 2026-05-18
Supplement: Supplementary file 1 [file d353529f0fcc8267571c2523.docx]

**Supplementary Table 1**: Search strategy of renal safety of bisphosphonates

As there was minimum information was obtained on initial research, a broad search strategy was conducted to identify critical information on the research question

*Tab 7(i): PubMed*

| **keywords** | **RCT/CT identified** |
| --- | --- |
| Bisphosphonates | 1,848/2788 |
| Alendronate | 746 |
| Risedronate | 301 |
| Ibandronate | 182 |
| Zoledronate | 560 |
| Etidronate | 525 |

*Tab 7((ii): Cochrane library*

| **keywords** | **RCT/CT** |
| --- | --- |
| Bisphosphonates | 2331 |
| Alendronate | 1520 |
| Risedronate | 708 |
| Ibandronate | 457 |
| Zoledronate | 1565 |
| Etidronate | 622 |

*Tab7(iii): Wiley online*

| **keywords** | **RCT/CT** |
| --- | --- |
| Bisphosphonates | 12956 |
| Alendronate | 4447 |
| Risedronate | 2155 |
| Ibandronate | 1202 |
| Zoledronate | 1101 |
| Etidronate | 1577 |

Google Scholars: Some of above results of three indexes were repeated in google scholar; no new article was identified

**Supplementary Table 2**: RoB 2 Tool of Assessment of Included trials

| **Included RCT** | **Randomization** | **Deviations** | **Missing Data** | **Outcome Measurement** | **Reporting Bias** | **Overall Risk** |
| --- | --- | --- | --- | --- | --- | --- |
| Smerud et al. 2012 | Low | Low | Some concerns | Low | Some concerns | Some concerns |
| Jamal et al. 2007 | Low | Low | Low | Low | Low | Low risk |
| Boonen et al. 2008 (ZA) | Low | Low | Low | Low | Some concerns | Low risk |
| Marques et al. 2019 | Low | Low | Some concerns | Low | Some concerns | Some concerns |
| Cruz et al. 2002 | Some concerns | Low | High | Low | Some concerns | High risk |
| Body et al. 2006 | Low | Low | Some concerns | Low | Low | Low risk |
| Torregrosa et al. 2011 | Some concerns | Low | Some concerns | Low | Some concerns | Some concerns |
| Yanık et al. 2007 | Some concerns | Some concerns | Low | Some concerns | Some concerns | Some concerns |
| Spencer et al. 2008 | Some concerns | Low | High | Low | Some concerns | High risk |
| Haas et al. 2003 | Some concerns | Low | High | Low | Some concerns | High risk |
| Kim et al. 2005 | High | Some concerns | High | Some concerns | High | High risk |
